# Supplementary material for: Tailor-made biofuel 2-butyltetrahydrofuran from the continuous flow hydrogenation and deoxygenation of furfuralacetone
Source: Royal Society of Chemistry journal article supplement (doi:10.1039/c9gc02555c), 2019-01-01
Supplement: c9gc02555c1.pdf [file c9gc02555c1.pdf]

## Supporting Information

### 1. Comparison of different Catalysts for the FFA Hydrogenation

**Table S1** Comparison of different metal catalysts in the Hydrogenation of furfuralacetone.<sup>a</sup>

| Entry          | Catalyst                          | 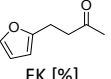 FK [%] |  FA [%] |  THFK [%] |  THFA [%] |  SP [%] |  OD [%] |
|----------------|-----------------------------------|------------------------------------------------------------------------------------------|------------------------------------------------------------------------------------------|--------------------------------------------------------------------------------------------|--------------------------------------------------------------------------------------------|-------------------------------------------------------------------------------------------|--------------------------------------------------------------------------------------------|
| 1              | Ru/C                              | 0                                                                                        | 0                                                                                        | 0                                                                                          | 88                                                                                         | 8                                                                                         | 3                                                                                          |
| 2              | Ru/Al <sub>2</sub> O <sub>3</sub> | 0                                                                                        | 0                                                                                        | 5                                                                                          | 89                                                                                         | 0                                                                                         | 5                                                                                          |
| 3              | Ru/SiO <sub>2</sub>               | 1                                                                                        | 1                                                                                        | 47                                                                                         | 47                                                                                         | 4                                                                                         | 1                                                                                          |
| 4              | Pd/C                              | 0                                                                                        | 4                                                                                        | 0                                                                                          | 67                                                                                         | 28                                                                                        | 1                                                                                          |
| 5              | Ni/SiO <sub>2</sub>               | 7                                                                                        | 14                                                                                       | 12                                                                                         | 64                                                                                         | 2                                                                                         | 1                                                                                          |
| 6              | Rh/SiO <sub>2</sub>               | 0                                                                                        | 0                                                                                        | 85                                                                                         | 15                                                                                         | 0                                                                                         | 0                                                                                          |
| 7 <sup>b</sup> | CuCr <sub>2</sub> O <sub>5</sub>  | 0                                                                                        | 89                                                                                       | 0                                                                                          | 3                                                                                          | 8                                                                                         | 0                                                                                          |
| 8 <sup>c</sup> | -                                 | 0                                                                                        | 0                                                                                        | 0                                                                                          | 0                                                                                          | 0                                                                                         | 0                                                                                          |

<sup>a</sup>Conditions: FFA (0.75 mmol), Ru/C (3.75 μmol), cyclohexane (1,5 mL), H<sub>2</sub> (40 bar), 100 °C, 2 h. <sup>b</sup>120 °C, 6 h. <sup>c</sup>no conversion observed without a catalyst.

### 2. Optimization of the THFA deoxygenation

**Table S2** Optimization of the deoxygenation of THFA based on a design of experiment approach.<sup>a</sup>

| Entry | Temperature [°C] | Sub/ H <sup>+</sup> | Sub/Ru | time [h] | pressure [bar] | Conversion [%] | BTHF [%] | Dimers [%] | 1-OL [%] | PTHP + MP <sub>2</sub> THF [%] |
|-------|------------------|---------------------|--------|----------|----------------|----------------|----------|------------|----------|--------------------------------|
| 1     | 140              | 3                   | 50     | 4        | 80             | 100            | 64       | 23         | 1        | 11                             |
| 2     | 140              | 3                   | 50     | 6        | 40             | 100            | 70       | 17         | 3        | 10                             |
| 3     | 140              | 3                   | 200    | 4        | 40             | 100            | 61       | 30         | 4        | 6                              |
| 4     | 140              | 3                   | 200    | 6        | 80             | 100            | 67       | 20         | 5        | 8                              |
| 5     | 140              | 15                  | 50     | 4        | 40             | 85             | 41       | 36         | 1        | 7                              |
| 6     | 140              | 15                  | 50     | 6        | 80             | 93             | 48       | 36         | 2        | 7                              |
| 7     | 140              | 15                  | 200    | 4        | 80             | 91             | 48       | 35         | 2        | 6                              |
| 8     | 140              | 15                  | 200    | 6        | 40             | 96             | 56       | 32         | 2        | 6                              |
| 9     | 160              | 3                   | 50     | 4        | 40             | 100            | 77       | 0          | 8        | 14                             |
| 10    | 160              | 3                   | 50     | 6        | 80             | 100            | 74       | 0          | 8        | 18                             |
| 11    | 160              | 3                   | 200    | 4        | 80             | 100            | 77       | 3          | 8        | 12                             |
| 12    | 160              | 3                   | 200    | 6        | 40             | 100            | 72       | 0          | 7        | 18                             |
| 13    | 160              | 15                  | 50     | 4        | 80             | 98             | 74       | 13         | 2        | 10                             |
| 14    | 160              | 15                  | 50     | 6        | 40             | 100            | 82       | 6          | 0        | 12                             |
| 15    | 160              | 15                  | 200    | 4        | 40             | 100            | 79       | 8          | 5        | 8                              |
| 16    | 160              | 15                  | 200    | 6        | 80             | 100            | 80       | 4          | 7        | 9                              |

<sup>a</sup>Conditions: THFA (0.75 mmol), Ru/C, Dowex 50WX8, H<sub>2</sub>, cyclohexane (1,5 mL).

**Table S3** Variation of ion exchange resin and temperature in the deoxygenation of THFA.<sup>a</sup>

| Entry | Ion exchange resin | Temperature<br>[°C] | BTHF<br>[%] | Dimers<br>[%] | 1-OL<br>[%] | PTHP + MPTHF<br>[%] |
|-------|--------------------|---------------------|-------------|---------------|-------------|---------------------|
| 1     | Dowex 50           | 160                 | 80          | 4             | 7           | 9                   |
| 2     | Dowex 50           | 150                 | 67          | 23            | 4           | 5                   |
| 3     | Amberlyst 36       | 160                 | 86          | 0             | 7           | 9                   |
| 4     | Amberlyst 36       | 150                 | 92          | 0             | 5           | 3                   |

<sup>a</sup>Conditions: THFA (0.75 mmol), Ru/C (3.75  $\mu$ mol Ru), ion exchange resin (0.05 mmol H<sup>+</sup>), H<sub>2</sub> (80 bar), 6 h, cyclohexane (1.5 mL).

**Table S4** Influence of the amount of Ru/C on the deoxygenation of THFA.<sup>a</sup>

| Entry | Ru/C<br>[mol% Ru] | BTHF<br>[%] | Dimers<br>[%] | 1-OL<br>[%] | PTHP + MPTHF<br>[%] | Others <sup>b</sup><br>[%] |
|-------|-------------------|-------------|---------------|-------------|---------------------|----------------------------|
| 1     | 0.5               | 91          | 1             | 4           | 4                   | 0                          |
| 2     | 1.0               | 90          | 2             | 4           | 3                   | 2                          |
| 3     | 2.0               | 87          | 1             | 3           | 3                   | 6                          |
| 4     | 5.0               | 74          | 0             | 0           | 3                   | 23                         |

<sup>a</sup>Conditions: THFA (0.38 mmol), Ru/C, ion exchange resin (0.05 mmol H<sup>+</sup>), H<sub>2</sub> (80 bar), 150 °C, 4 h, cyclohexane (1.5 mL). <sup>b</sup>Others include Heptane, Octane and Methylene tetrahydrofuran.

### 3. Catalyst Deactivation in the Continuous Flow Hydrogenation of FFA

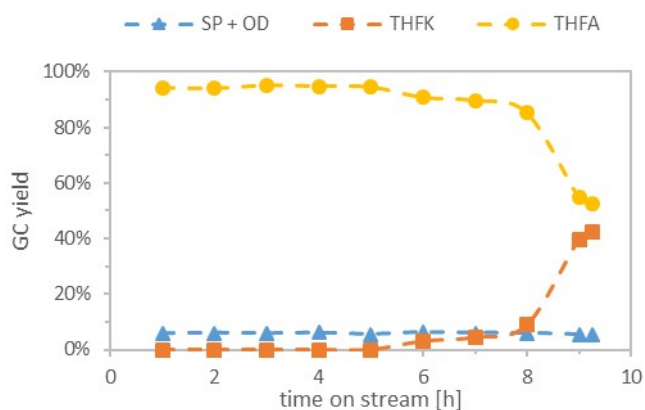

**Fig. S1** Continuous Flow Hydrogenation of a FFA (0.25 mol/L) solution in cyclohexane at 80 °C. Conditions: catalyst bed: 1 g Ru/C, 80 °C, substrate flowrate: 1 mL/min, hydrogen flowrate: 37 mL<sub>N</sub>/min, pressure: 80 bar.

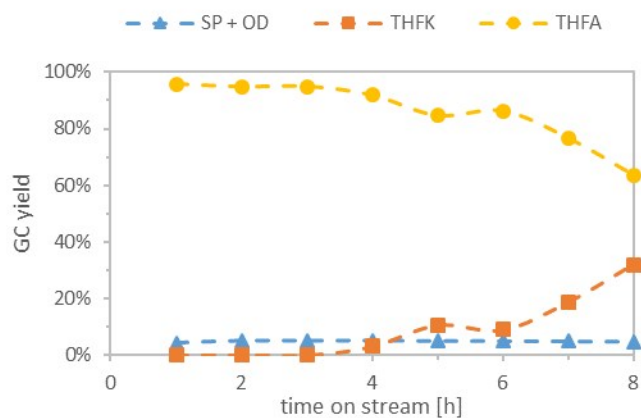

**Fig. S2** Continuous Flow Hydrogenation of a FFA (0.25 mol/L) solution in cyclohexane at 100 °C. Conditions: catalyst bed: 1 g Ru/C, 100 °C, substrate flowrate: 1 mL/min, hydrogen flowrate: 37 mL<sub>N</sub>/min, pressure: 80 bar.

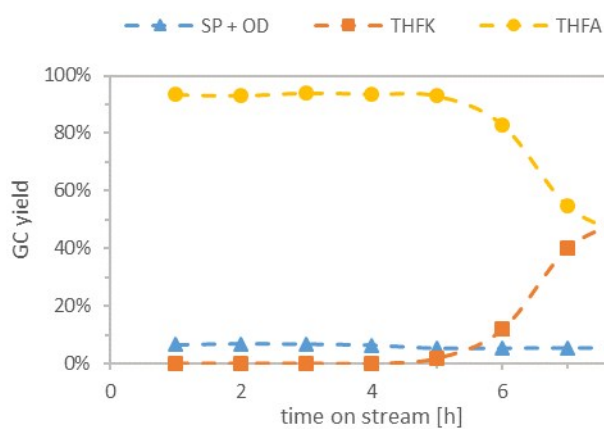

**Fig. S3** Continuous Flow Hydrogenation of a FFA (0.25 mol/L) solution in cyclohexane at 120 °C. Conditions: catalyst bed: 1 g Ru/C, 120 °C, substrate flowrate: 1 mL/min, hydrogen flowrate: 37 mL<sub>h</sub>/min, pressure: 80 bar.

#### 4. Characterization of the Ru/C-Catalyst Before and After Catalysis

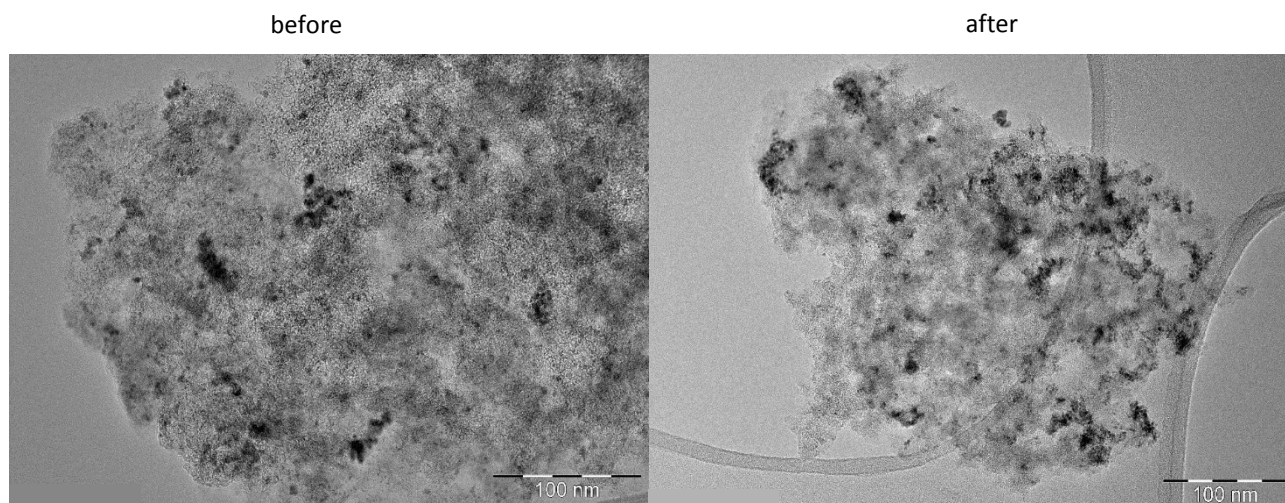

Fig. S4 TEM images of Ru/C before (left) and after (right) continuous flow hydrogenation at 80 °C. For reaction conditions see Fig. S1.

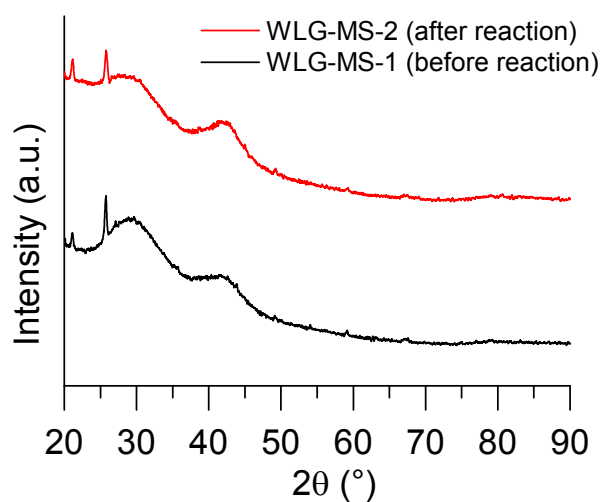

Fig. S5 X-ray diffractogram of Ru/C before (black) and after (red) continuous flow hydrogenation at 80 °C. For reaction conditions see Fig. S1.

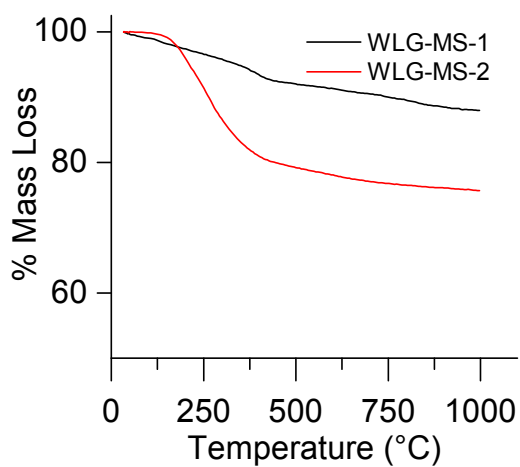

Fig. S6 TG analysis of Ru/C before (black) and after (red) continuous flow hydrogenation at 80 °C. For reaction conditions see Fig. S1.

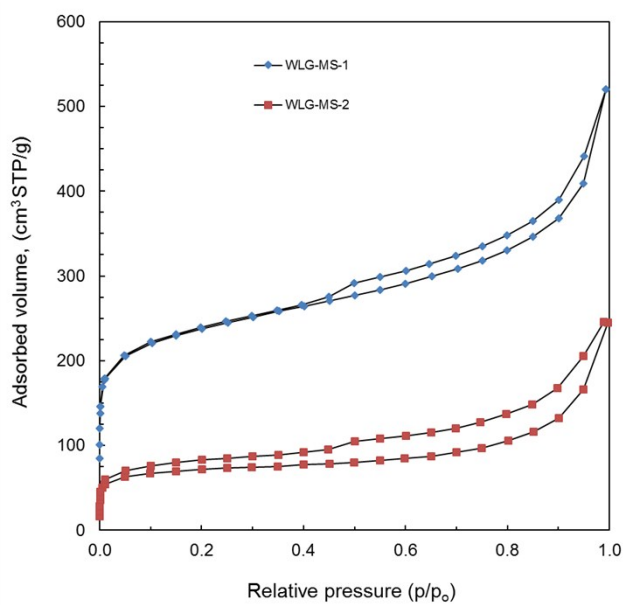

| Sample code | $S_{\text{BET}}$ ( $\text{m}^2 \text{g}^{-1}$ ) | $V_p$ ( $\text{cm}^3 \text{g}^{-1}$ ) |
|-------------|-------------------------------------------------|---------------------------------------|
| WLG-MS-1    | 860                                             | 0.81                                  |
| WLG-MS-2    | 260                                             | 0.38                                  |

**Fig. S7** BET analysis of Ru/C before (blue) and after (red) continuous flow hydrogenation at 80 °C. For reaction conditions see Fig. S1.

## 5. NMR Spectra

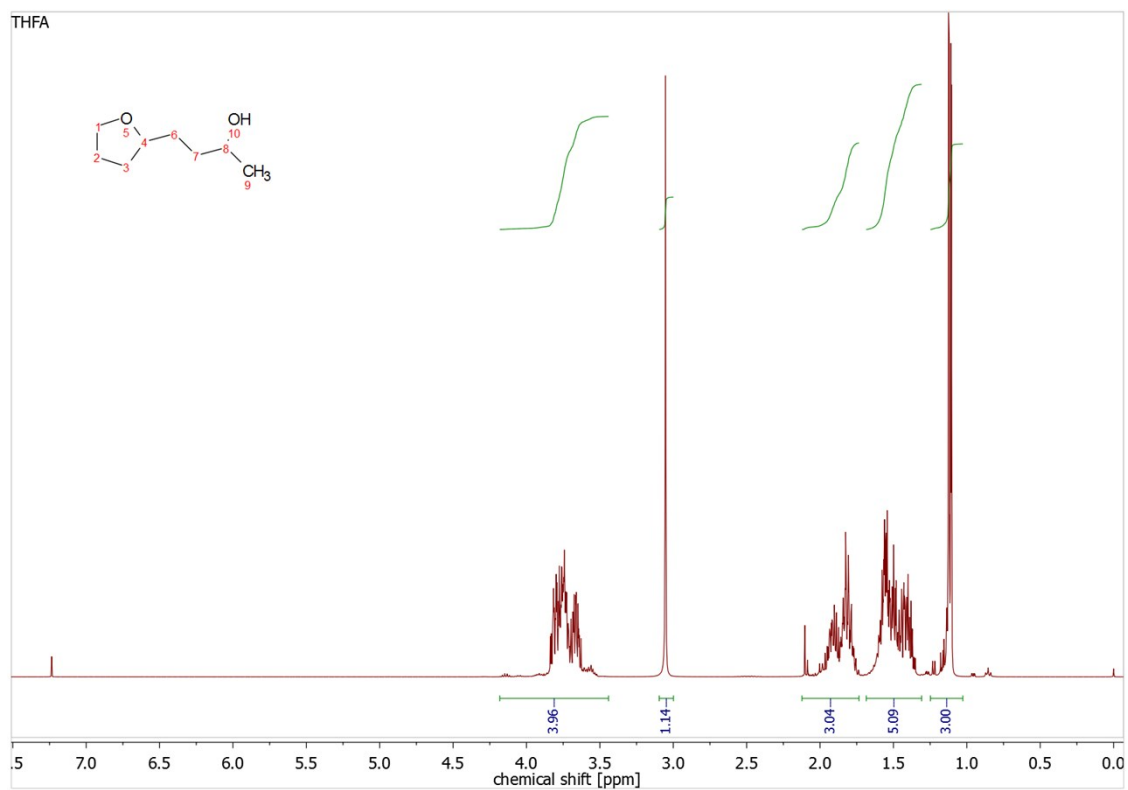

Fig. S8  $^1\text{H}$ -NMR spectrum of THFA.

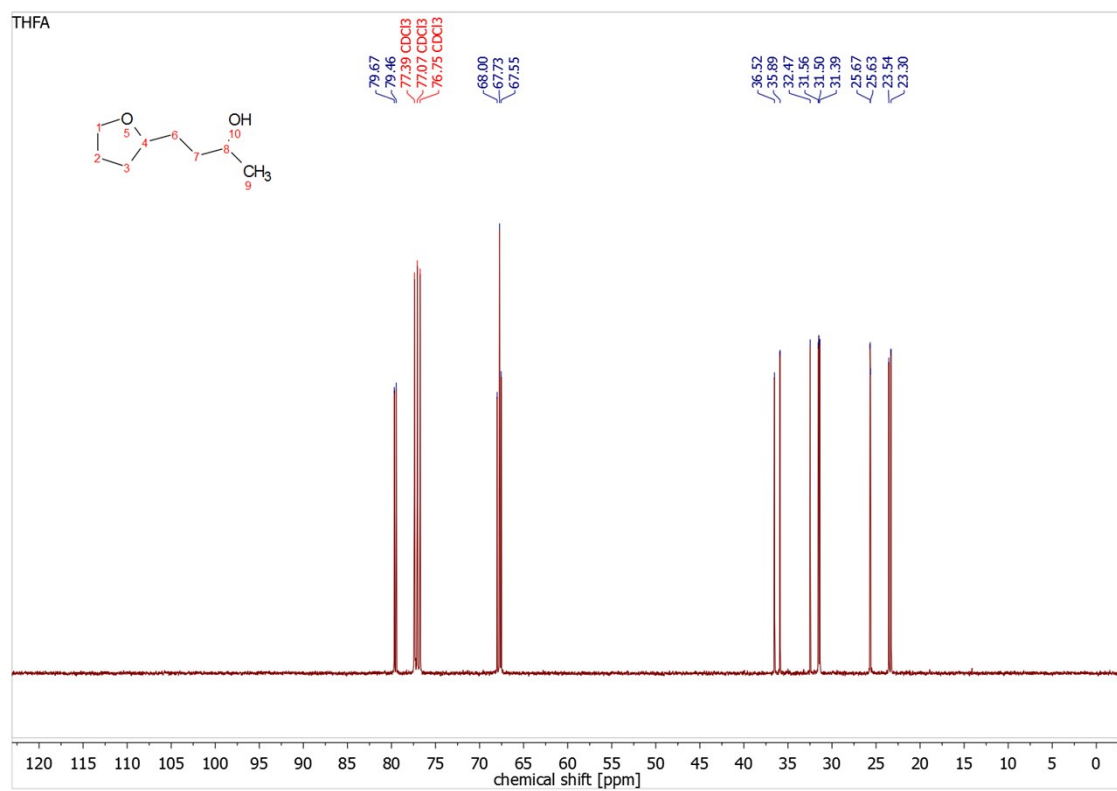

Fig. S9  $^{13}\text{C}$ -NMR spectrum of THFA.

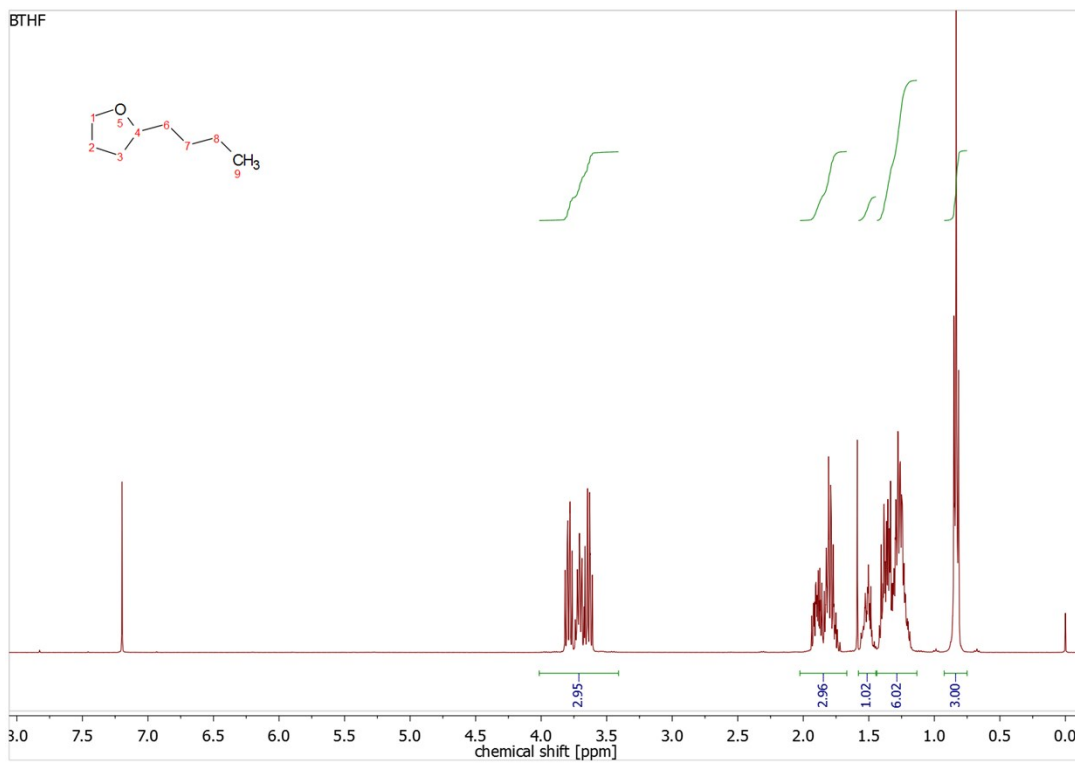

Fig. S10  $^1\text{H}$ -NMR spectrum of BTHF.

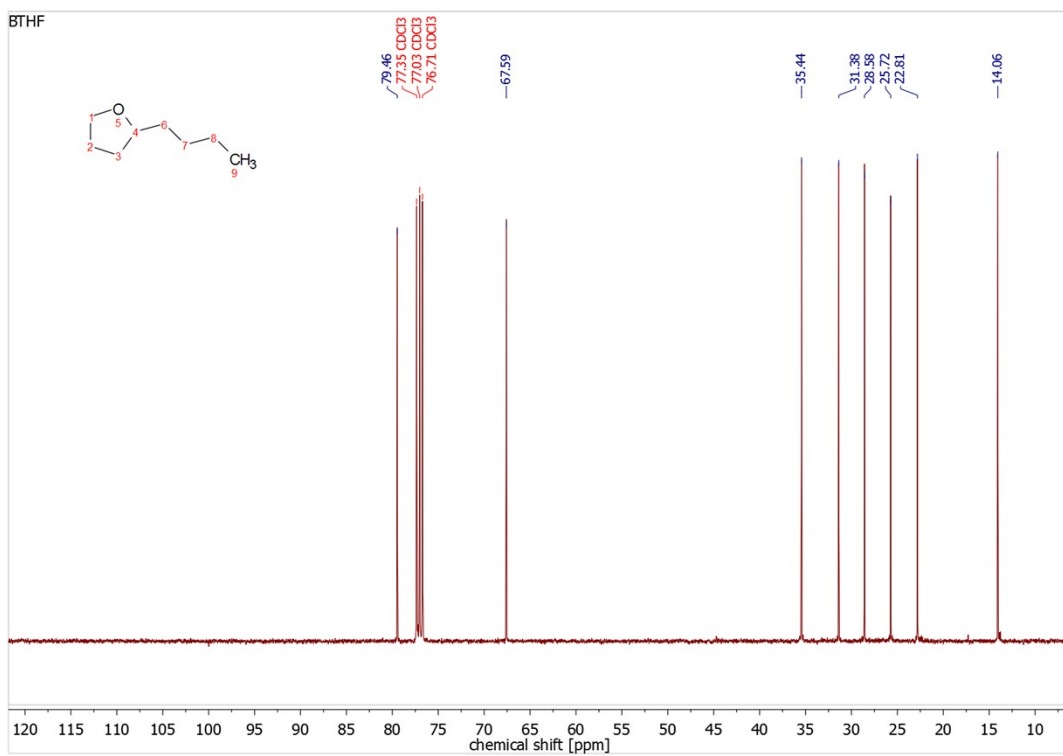

Fig. S11  $^{13}\text{C}$ -NMR spectrum of BTHF.
